# Supplementary material for: Virtual clinical trials: A tool for predicting patients who may benefit from treatment beyond progression with pembrolizumab in non‐small cell lung cancer
Source: PubMed Central journal article supplement — CPT Pharmacometrics Syst Pharmacol. 2022 Dec 22;12(2):236–49. doi: 10.1002/psp4.12896 (PMC9931430; doi:10.1002/psp4.12896), 2022-12-22

Model fitting was performed in Monolix 2021 R1. Software recommendations were used to select error and correlation models (where applicable).

## ADRENAL

### Parameter estimates

Recommended error model: CONSTANT

|                                                 | VALUE   | S.E.    | R.S.E.(%) |
|-------------------------------------------------|---------|---------|-----------|
| <b>Fixed Effects</b>                            |         |         |           |
| f_pop                                           | 0.1     | 0.13    | 124       |
| kge_pop                                         | 0.0019  | 0.00086 | 44.5      |
| kkill_pop                                       | 0.00079 | 0.00045 | 56.9      |
| <b>Standard Deviation of the Random Effects</b> |         |         |           |
| omega_f                                         | 5.3     | 3.6     | 67.9      |
| omega_kge                                       | 1.06    | 0.21    | 19.5      |
| omega_kkill                                     | 2.2     | 0.36    | 16.3      |
| <b>Error Model Parameters</b>                   |         |         |           |
| a                                               | 0.1     | 0.0044  | 4.36      |

### Observations

Normalized lesion diameter

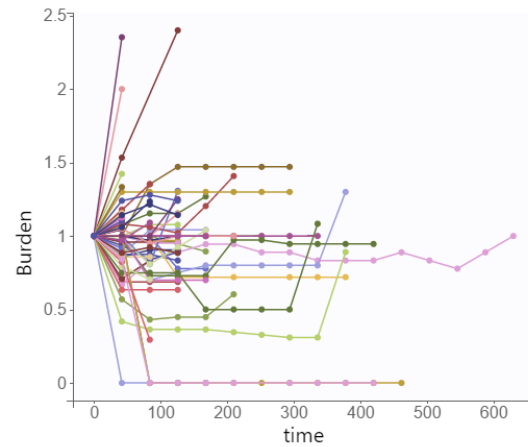

### Diagnostic plots

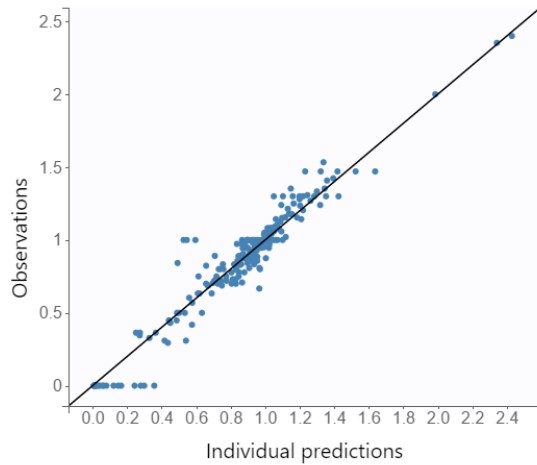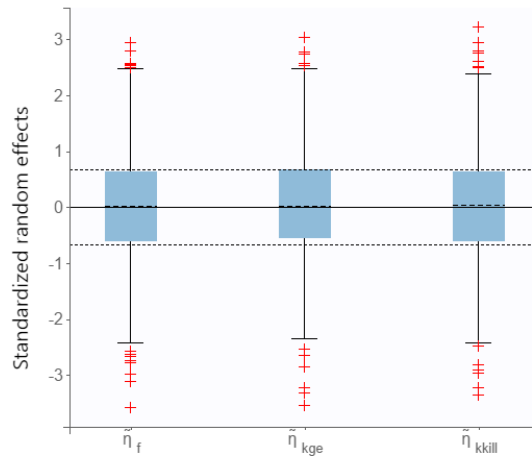

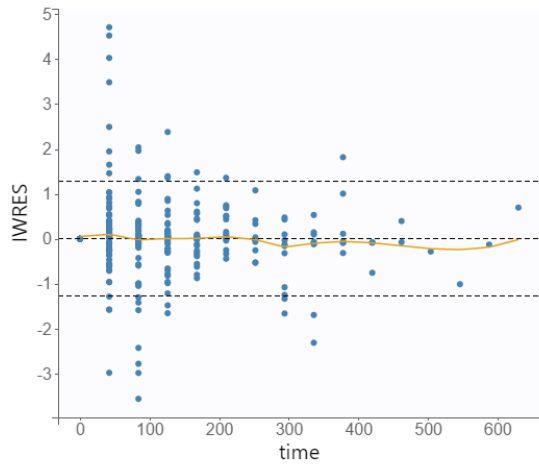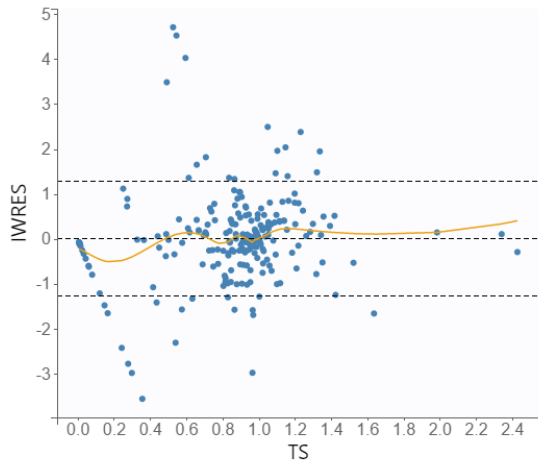

**Individual parameter estimates**

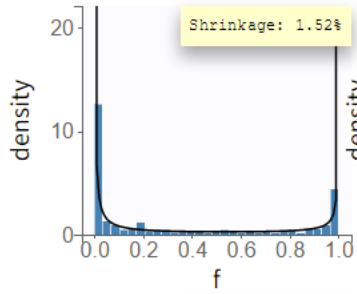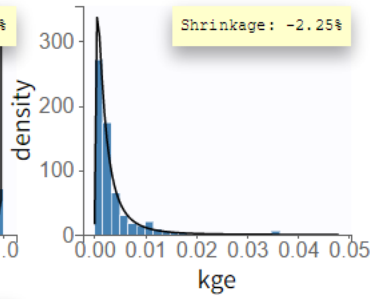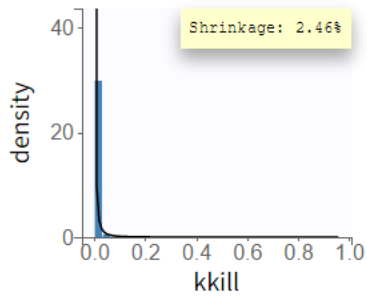

---

---

## BONE

### Parameter estimates

Recommended error model: PROPORTIONAL

|                                                 | VALUE   | S.E.    | R.S.E.(%) |
|-------------------------------------------------|---------|---------|-----------|
| <b>Fixed Effects</b>                            |         |         |           |
| f_pop                                           | 0.72    | 0.1     | 13.8      |
| kge_pop                                         | 0.00079 | 0.00036 | 45        |
| kkill_pop                                       | 0.0078  | 0.0048  | 61.9      |
| <b>Standard Deviation of the Random Effects</b> |         |         |           |
| omega_f                                         | 1.02    | 0.29    | 28.4      |
| omega_kge                                       | 1.13    | 0.32    | 28.5      |
| omega_kkill                                     | 1.18    | 0.5     | 42.2      |
| <b>Error Model Parameters</b>                   |         |         |           |
| b                                               | 0.1     | 0.0083  | 8.03      |

### Observations

Normalized lesion diameter

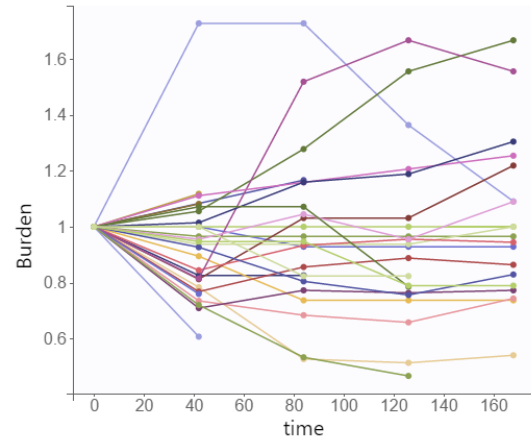

---

### Diagnostic plots

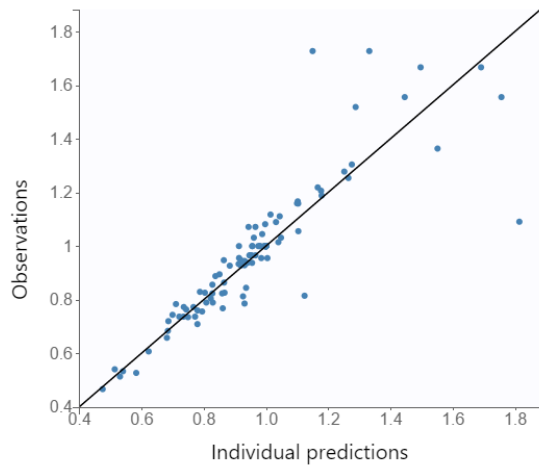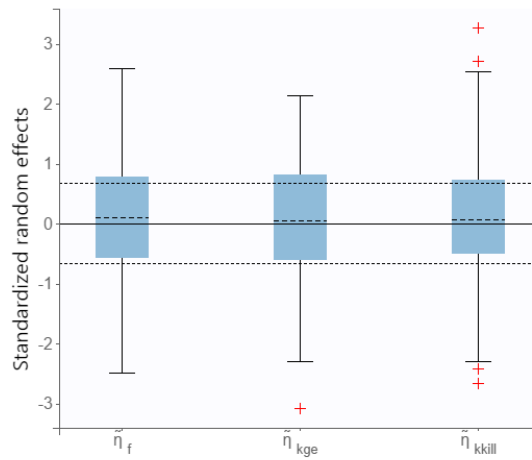

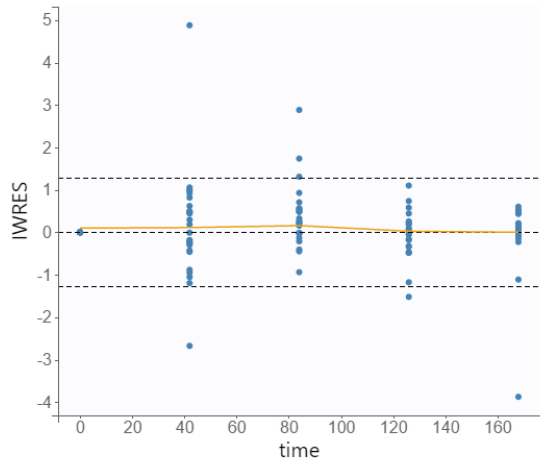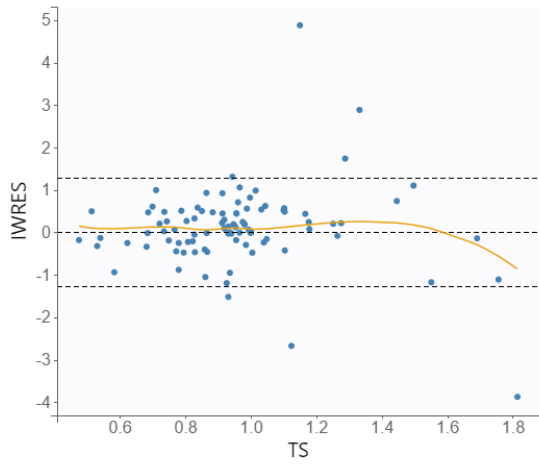

**Individual parameter estimates**

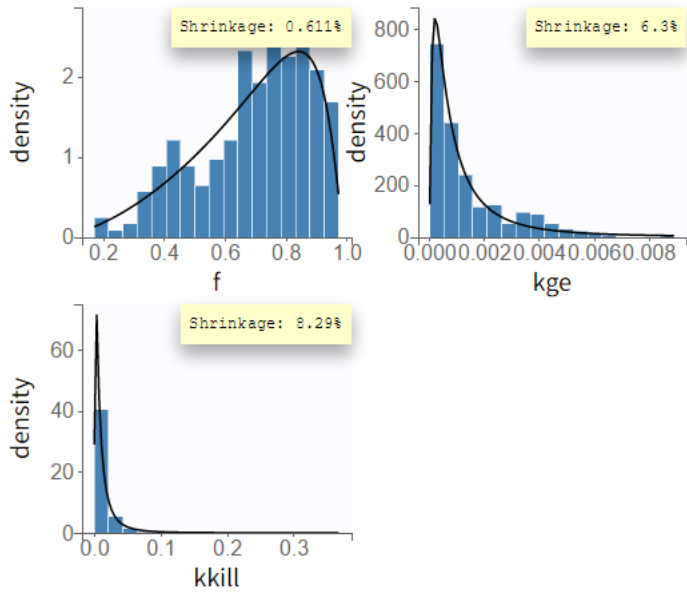

---

---

## LIVER

### Parameter estimates

Recommended error model: CONSTANT

|                                                 | VALUE  | S.E.    | R.S.E.(%) |
|-------------------------------------------------|--------|---------|-----------|
| <b>Fixed Effects</b>                            |        |         |           |
| f_pop                                           | 0.06   | 0.061   | 102       |
| kge_pop                                         | 0.0034 | 0.00220 | 64.9      |
| kkill_pop                                       | 0.0024 | 0.001   | 43.9      |
| <b>Standard Deviation of the Random Effects</b> |        |         |           |
| omega_f                                         | 2.8    | 0.81    | 28.8      |
| omega_kge                                       | 1.01   | 0.29    | 29        |
| omega_kkill                                     | 1.79   | 0.29    | 16.2      |
| <b>Error Model Parameters</b>                   |        |         |           |
| a                                               | 0.12   | 0.0063  | 5.05      |

### Observations

Normalized lesion diameter

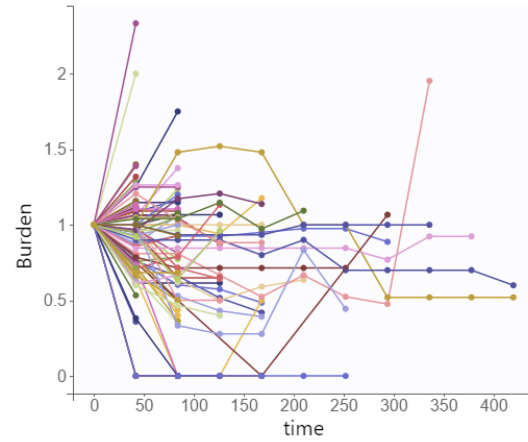

---

---

### Diagnostic plots

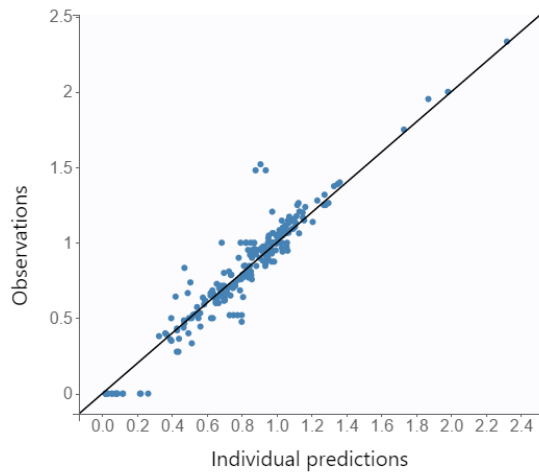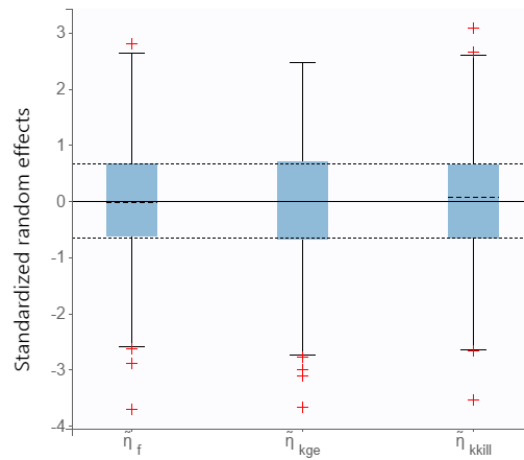

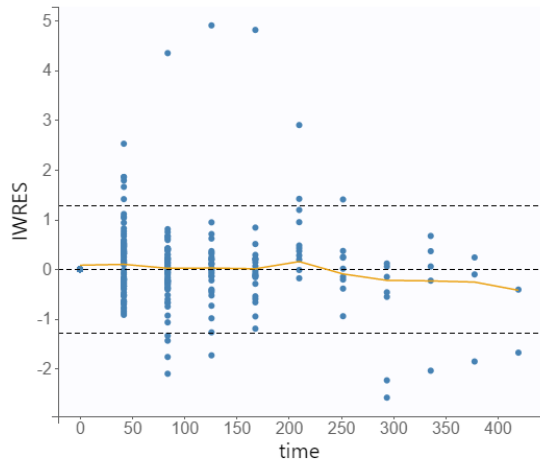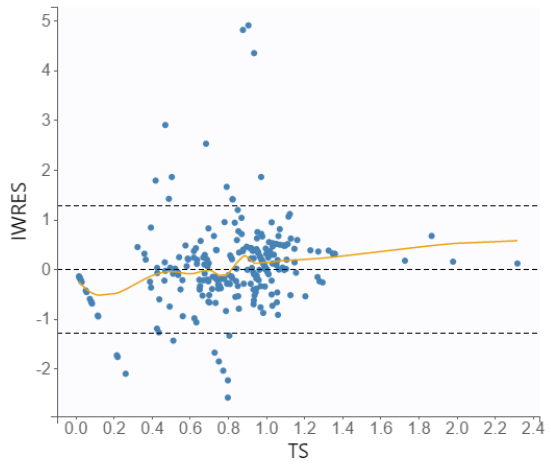

**Individual parameter estimates**

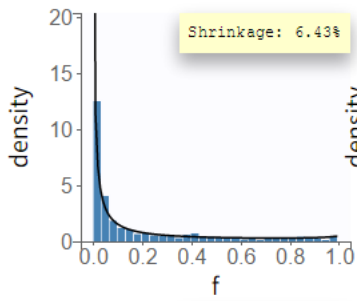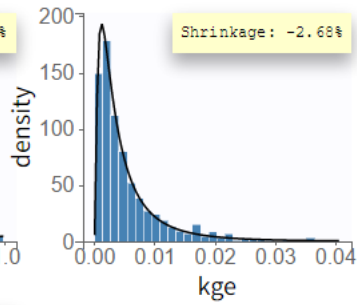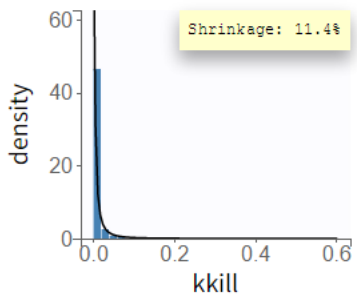

---

---

## LUNG

### Parameter estimates

Recommended error model: CONSTANT

|                                                 | VALUE  | S.E.    | R.S.E.(%) |
|-------------------------------------------------|--------|---------|-----------|
| <b>Fixed Effects</b>                            |        |         |           |
| f_pop                                           | 0.27   | 0.028   | 10.3      |
| kge_pop                                         | 0.0013 | 0.00016 | 12.9      |
| kkill_pop                                       | 0.0091 | 0.00071 | 7.74      |
| <b>Standard Deviation of the Random Effects</b> |        |         |           |
| omega_f                                         | 2.16   | 0.1     | 4.66      |
| omega_kge                                       | 1.57   | 0.083   | 5.3       |
| omega_kkill                                     | 1.24   | 0.063   | 5.11      |
| <b>Correlations</b>                             |        |         |           |
| corr_kge_f                                      | -0.64  | 0.038   | 5.92      |
| <b>Error Model Parameters</b>                   |        |         |           |
| a                                               | 0.095  | 0.0013  | 1.4       |

### Observations

Normalized lesion diameter

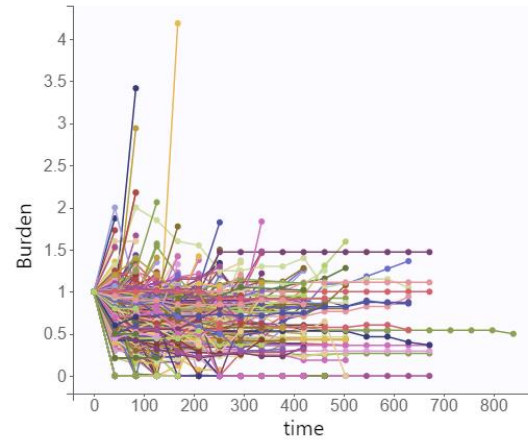

---

---

### Diagnostic plots

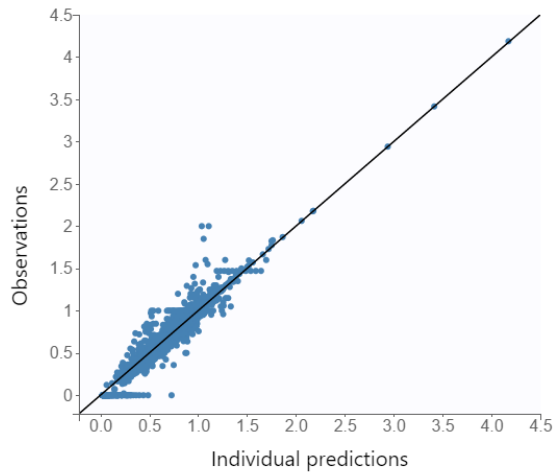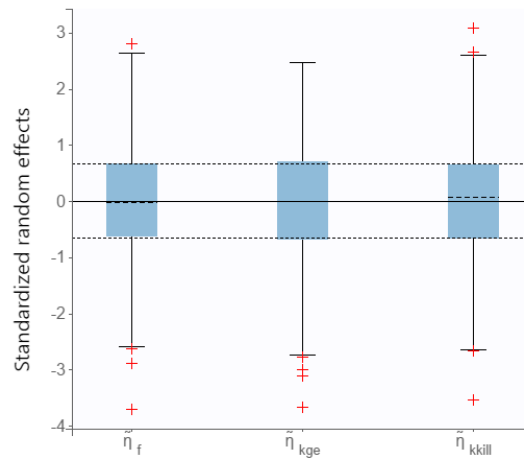

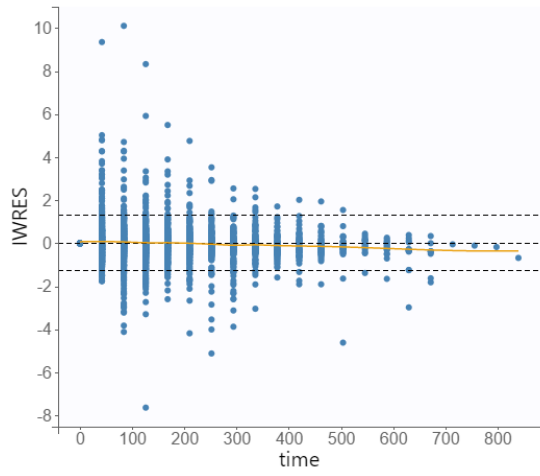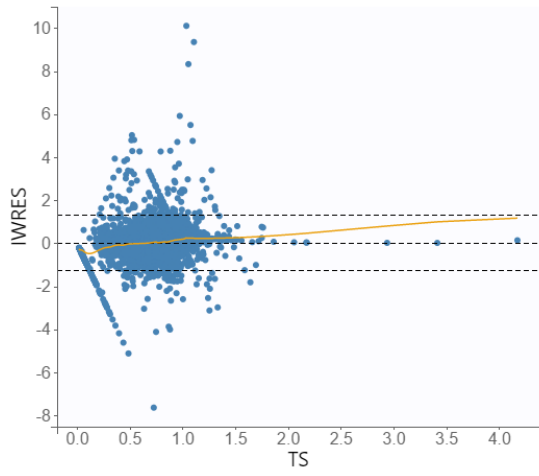

### Individual parameter estimates

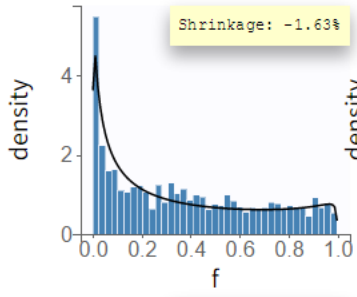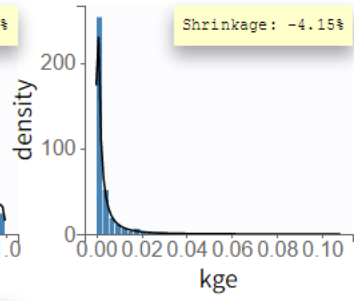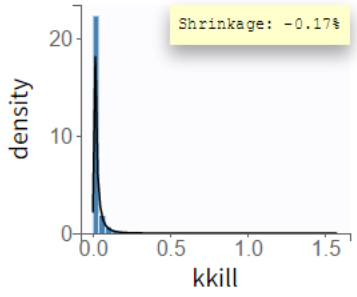



---

---

## LYMPH NODES

### Parameter estimates

Recommended error model: CONSTANT

|                                                 | VALUE  | S.E.    | R.S.E.(%) |
|-------------------------------------------------|--------|---------|-----------|
| <b>Fixed Effects</b>                            |        |         |           |
| f_pop                                           | 0.14   | 0.026   | 18.2      |
| kge_pop                                         | 0.0006 | 0.00010 | 15.8      |
| kkill_pop                                       | 0.0086 | 0.00079 | 9.19      |
| <b>Standard Deviation of the Random Effects</b> |        |         |           |
| omega_f                                         | 3.17   | 0.18    | 5.56      |
| omega_kge                                       | 1.72   | 0.1     | 5.84      |
| omega_kkill                                     | 1.43   | 0.077   | 5.38      |
| <b>Correlations</b>                             |        |         |           |
| corr_kkill_f                                    | 0.41   | 0.077   | 18.5      |
| <b>Error Model Parameters</b>                   |        |         |           |
| a                                               | 0.11   | 0.0014  | 1.21      |

### Observations

Normalized lesion diameter

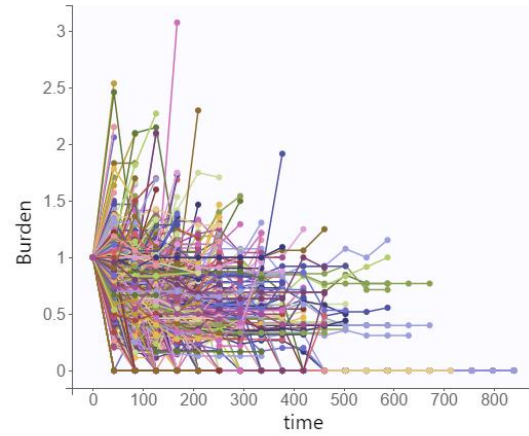

---

---

## Diagnostic plots

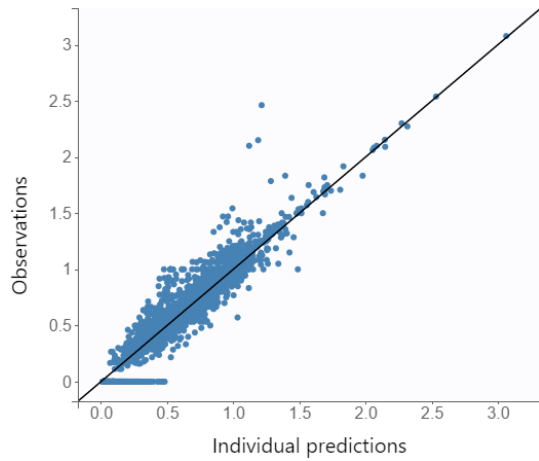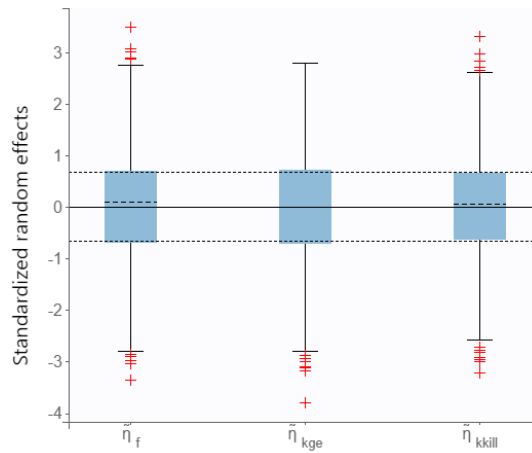

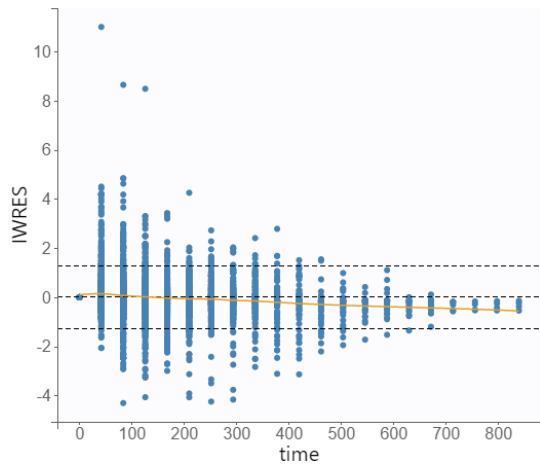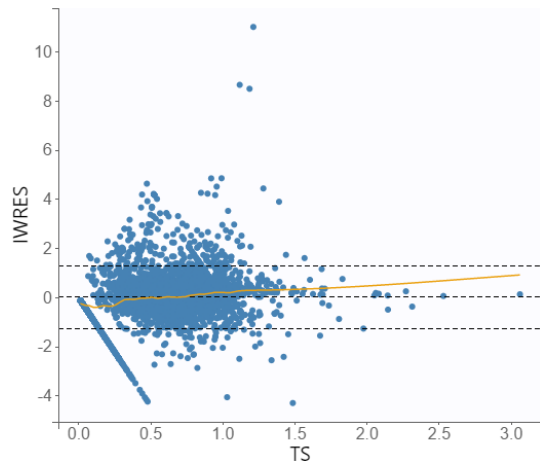

### Individual parameter estimates

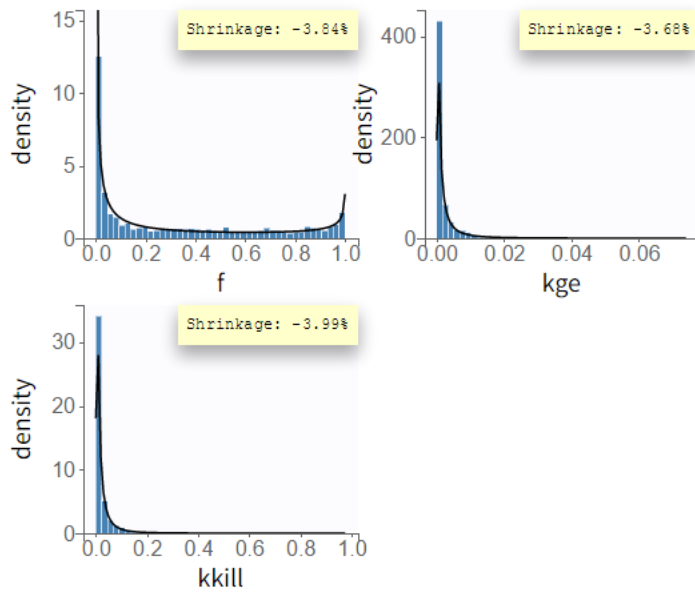

---

---

## OTHER

### Parameter estimates

Recommended error model: CONSTANT

|                                                 | VALUE  | S.E.    | R.S.E.(%) |
|-------------------------------------------------|--------|---------|-----------|
| <b>Fixed Effects</b>                            |        |         |           |
| f_pop                                           | 0.047  | 0.052   | 109       |
| kge_pop                                         | 0.0033 | 0.00240 | 72.3      |
| kkill_pop                                       | 0.0051 | 0.00097 | 19.1      |
| <b>Standard Deviation of the Random Effects</b> |        |         |           |
| omega_f                                         | 3.8    | 1.18    | 30.9      |
| omega_kge                                       | 1.28   | 0.44    | 34.3      |
| omega_kkill                                     | 0.79   | 0.14    | 17.5      |
| <b>Error Model Parameters</b>                   |        |         |           |
| a                                               | 0.16   | 0.0092  | 5.9       |

### Normalized lesion diameter

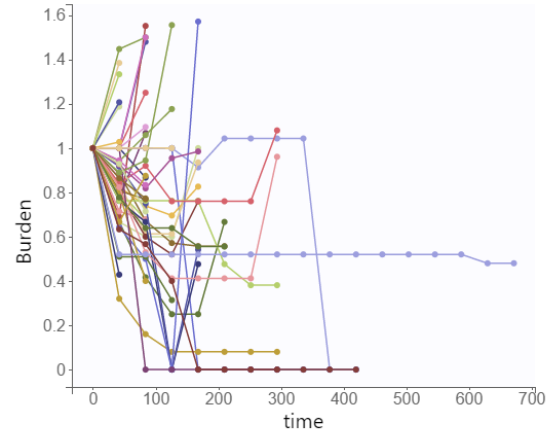

## Observations

---

### Diagnostic plots

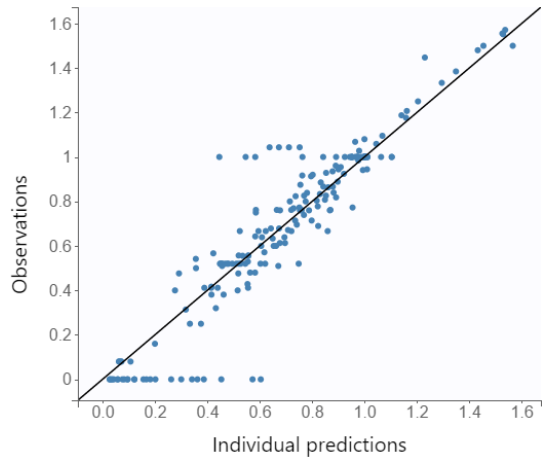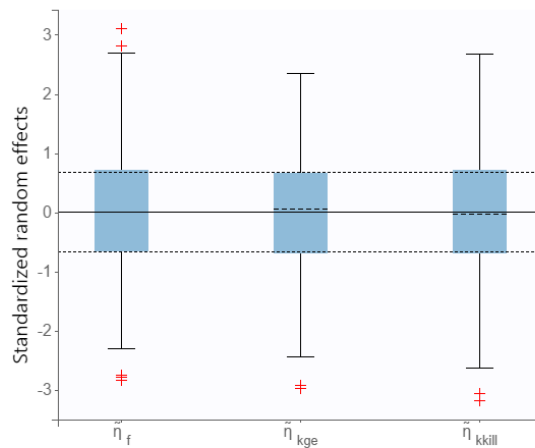

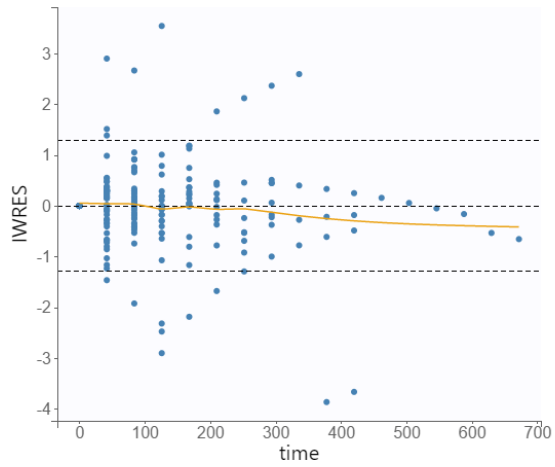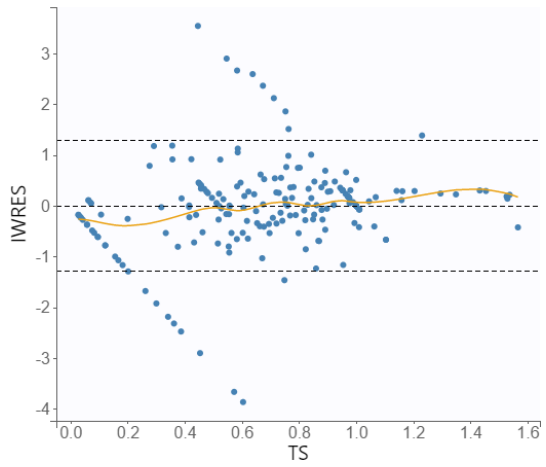

### Individual parameter estimates

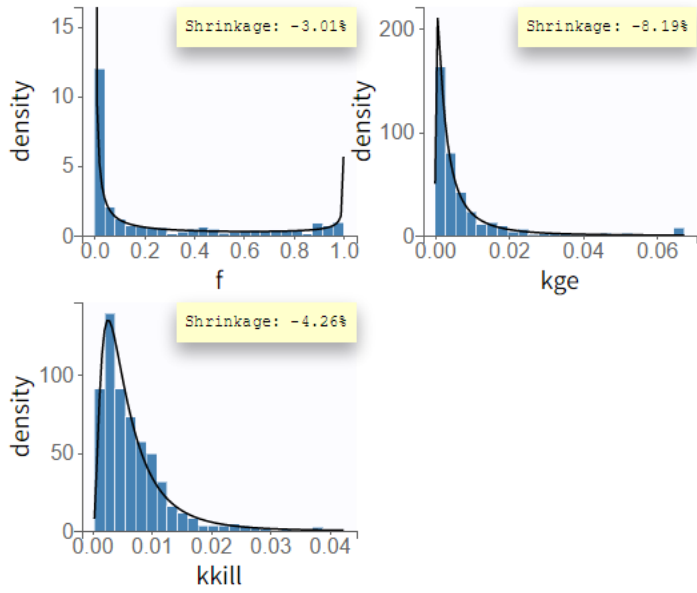

---

---

## PLEURA

### Parameter estimates

Recommended error model: PROPORTIONAL

|                                                 | VALUE  | S.E.    | R.S.E.(%) |
|-------------------------------------------------|--------|---------|-----------|
| <b>Fixed Effects</b>                            |        |         |           |
| f_pop                                           | 0.1    | NA      | NA        |
| kge_pop                                         | 2E-06  | 4.6E-06 | 229       |
| kkill_pop                                       | 0.28   | 1.35    | 486       |
| <b>Standard Deviation of the Random Effects</b> |        |         |           |
| omega_f                                         | 275.77 | 174.31  | 63.2      |
| omega_kge                                       | 1.88   | 1.5     | 79.6      |
| omega_kkill                                     | 7.96   | 5.63    | 70.7      |
| <b>Error Model Parameters</b>                   |        |         |           |
| b                                               | 0.53   | 0.052   | 9.86      |

### Observations

Normalized lesion diameter

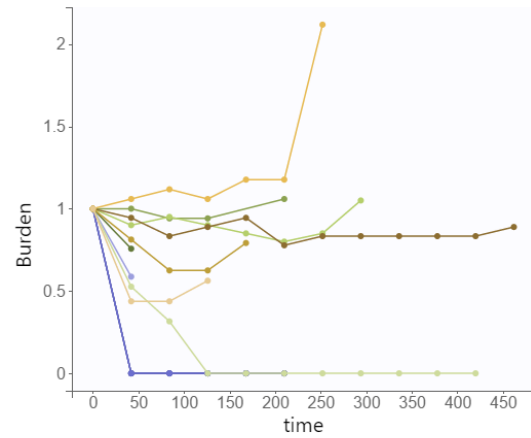

---

### Diagnostic plots

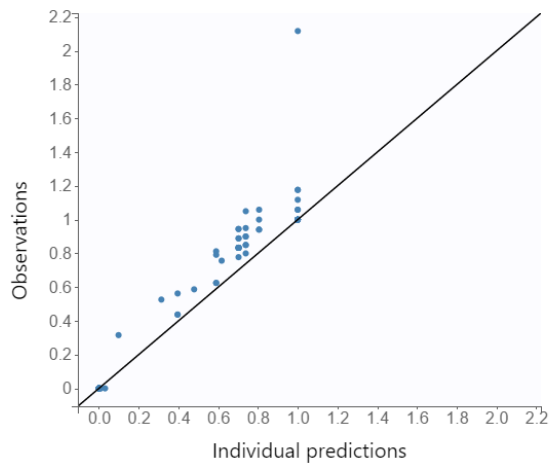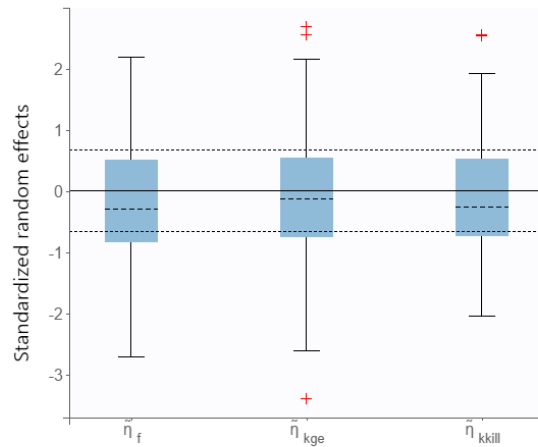

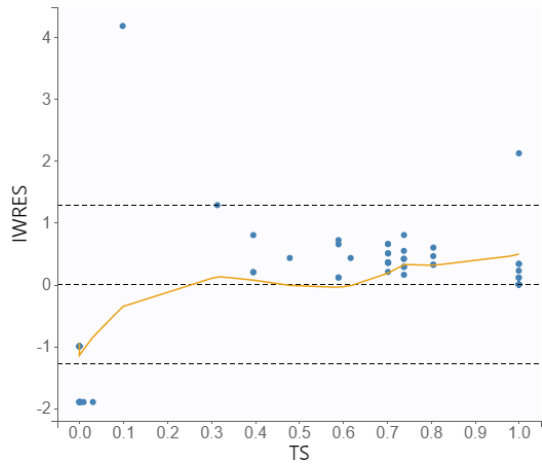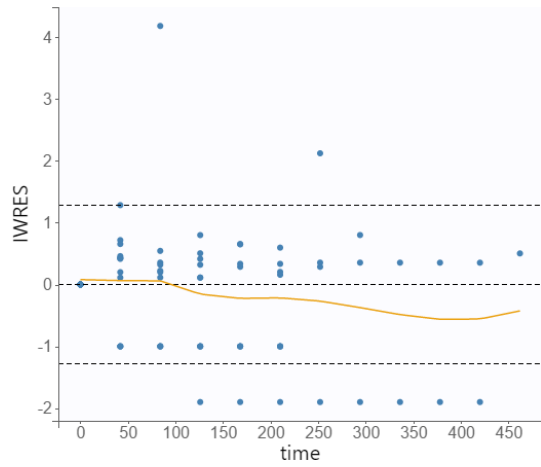

### Individual parameter estimates

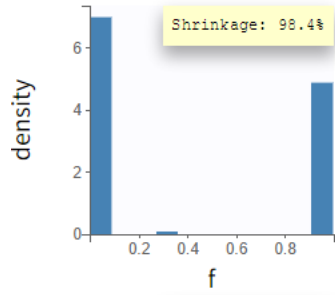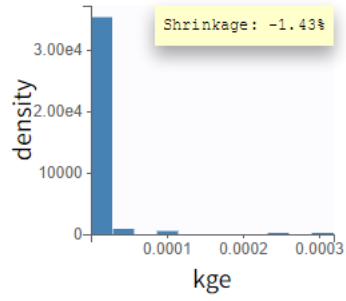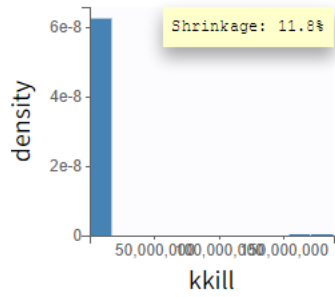

---

---

## SOFT TISSUES

### Parameter estimates

Recommended error model: CONSTANT

|  | VALUE | S.E. | R.S.E.(%) |
|--|-------|------|-----------|
|--|-------|------|-----------|

| Fixed Effects                            |        |         |      |
|------------------------------------------|--------|---------|------|
| f_pop                                    | 0.24   | 0.32    | 135  |
| kge_pop                                  | 0.0001 | 0.00048 | 478  |
| kkill_pop                                | 0.0072 | 0.0064  | 89.6 |
| Standard Deviation of the Random Effects |        |         |      |
| omega_f                                  | 1.51   | 0.91    | 60.3 |
| omega_kge                                | 2.88   | 1.83    | 63.7 |
| omega_kkill                              | 1.73   | 0.27    | 15.9 |
| Error Model Parameters                   |        |         |      |
| a                                        | 0.11   | 0.0073  | 6.87 |

### Observations

Normalized lesion diameter

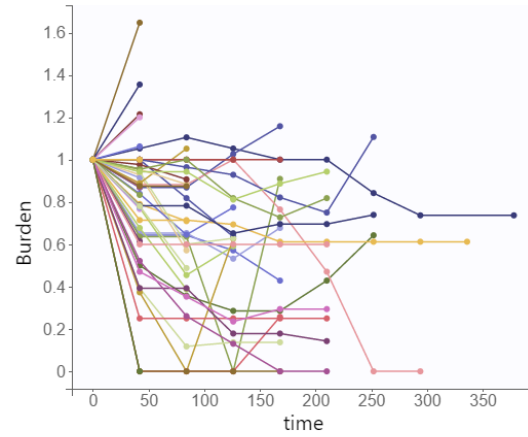

---

---

### Diagnostic plots

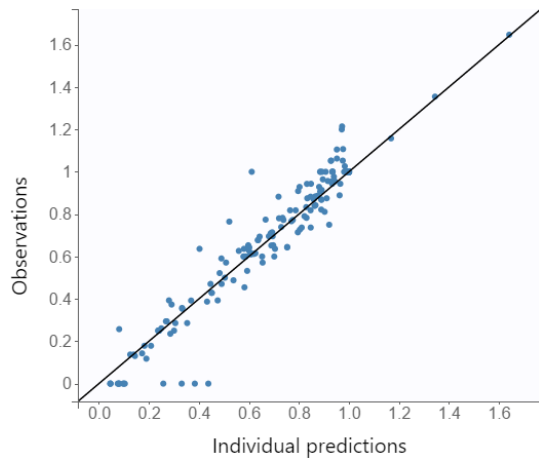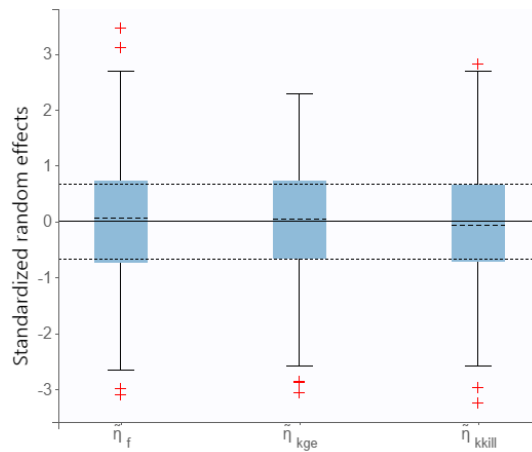

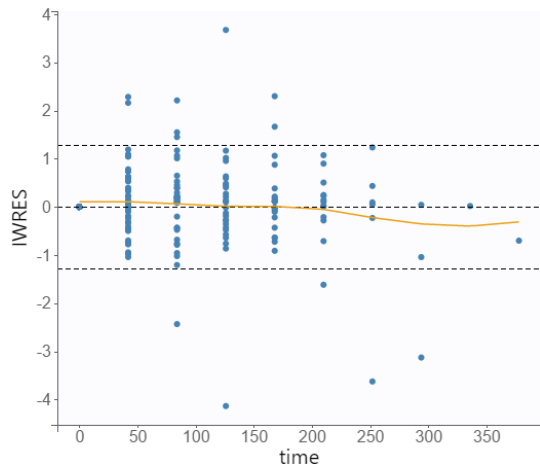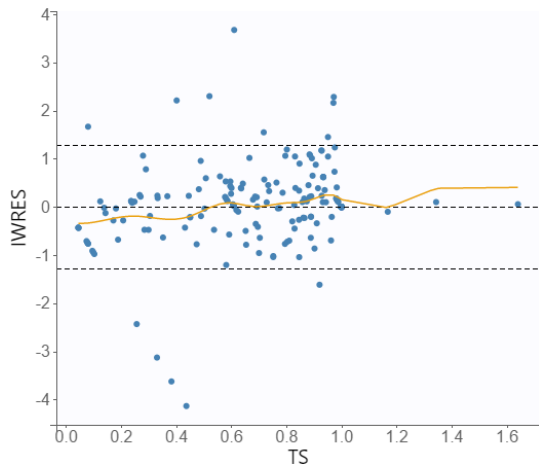

**Individual parameter estimates**

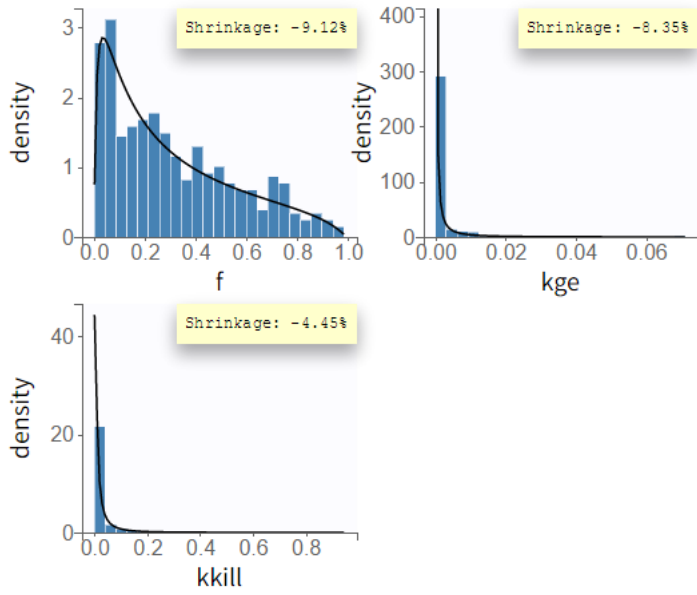

Supplement: PSP4-12-236-s002.pdf [file PSP4-12-236-s002.pdf]
